# Supplementary material
Source: PubMed Central journal article supplement (PMC3602408)

Supplementary Figure S1

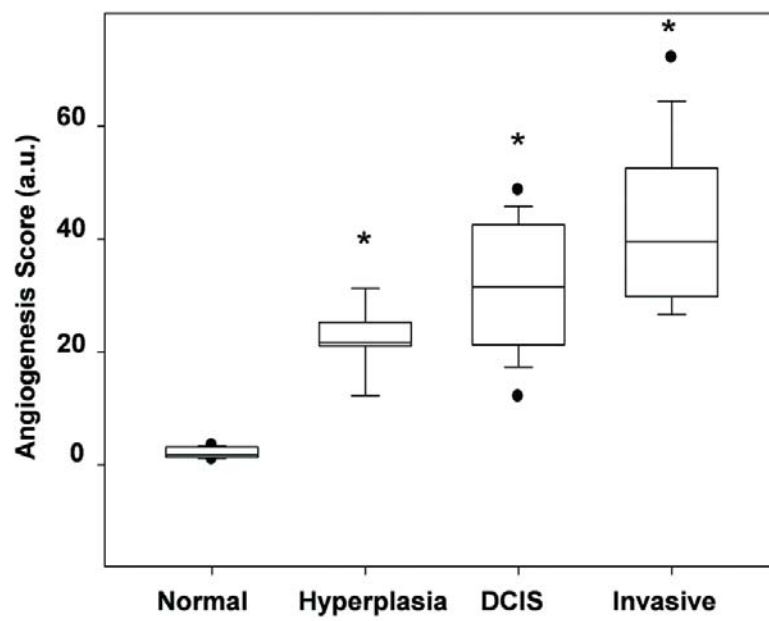

Supplement: NIHMS436803-supplement-2.pdf [file NIHMS436803-supplement-2.pdf]
